# Supplementary material
Source: PubMed Central journal article supplement (PMC4476635)
Supplement: NIHMS697790-supplement-ESI.pdf [file NIHMS697790-supplement-ESI.pdf]

# Aza-BODIPY Dyes With Enhanced Hydrophilicity

## Supporting Information

Anyanee Kamkaew<sup>a</sup> and Kevin Burgess<sup>\*a,b</sup>

<sup>a</sup> Department of Chemistry, Texas A & M University, Box 30012, College Station, TX 77842.

<sup>b</sup> Department of Pharmacology, Faculty of Medicine, University of Malaya, 50603 Kuala Lumpur, Malaysia.

|                                                           |    |
|-----------------------------------------------------------|----|
| 1. General Procedures .....                               | 2  |
| 2. Syntheses Of Sulfonated aza-BODIPY Derivatives .....   | 3  |
| 3. Spectroscopic Data Of Compound 4. ....                 | 14 |
| 4. Thermodynamic Equilibrium Solubility Measurement ..... | 16 |
| 5. Cell Culture And Imaging Studies .....                 | 17 |

## 1. General Procedures

All reactions were carried out under an atmosphere of dry argon. Glassware was oven-dried prior to use. Unless otherwise indicated, common reagents or materials were obtained from commercial source and used without further purification. Dry DMF, (<50 ppm water) was purchased from EMD. Tetrahydrofuran (THF), acetonitrile (MeCN), dichloromethane ( $\text{CH}_2\text{Cl}_2$ ), and methanol (MeOH) were dried by MBRAUN solvent drying system. Other solvents and reagents were used as received.

NMR spectra were recorded on a Bruker-400 MHz spectrometer ( $^1\text{H}$  at 400 MHz and  $^{13}\text{C}$  at 100 MHz) at room temperature unless otherwise mentioned. Chemical shifts of  $^1\text{H}$  NMR spectra were recorded and reported in ppm from the solvent resonance ( $\text{CDCl}_3$  7.26 ppm,  $\text{CD}_3\text{OD}$  3.30 ppm,  $\text{DMSO-d}_6$  2.50 ppm). Data are reported as follows: chemical shift, multiplicity (s = singlet, br = broad, d = doublet, t = triplet, q = quartet, m = multiplet), coupling constants, and number of protons. Proton decoupled  $^{13}\text{C}$  NMR spectra were also recorded in ppm from tetramethylsilane (TMS) resonance ( $\text{CDCl}_3$  77.0,  $\text{CD}_3\text{OD}$  49.1,  $\text{DMSO-d}_6$  39.5 ppm). Analytical thin layer chromatography (TLC) was performed on EM Reagents 0.25 mm silica-gel 60-F plates, and visualized with UV light. Flash chromatography was performed using silica gel 60 (230–400 mesh). MS were measured under ESI or MALDI conditions.

## 2. Syntheses Of Sulfonated aza-BODIPY Derivatives

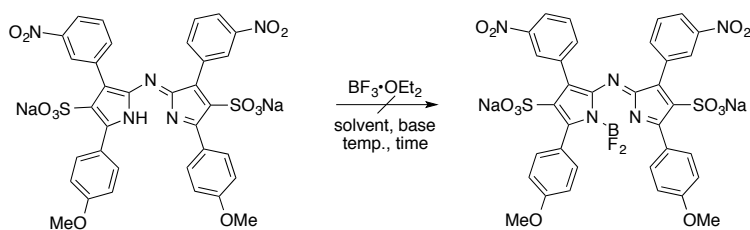

**Table S1.** Conditions to form  $\text{BF}_2$  complex.

| Solvent                             | Base                        | Temperature ( $^{\circ}\text{C}$ ) | Time (h) |
|-------------------------------------|-----------------------------|------------------------------------|----------|
| toluene                             | ${}^i\text{Pr}_2\text{EtN}$ | 80                                 | 12       |
| $\text{CH}_2\text{Cl}_2$            | ${}^i\text{Pr}_2\text{EtN}$ | 25                                 | 12       |
| $\text{CH}_2\text{Cl}_2$            | $\text{Et}_3\text{N}$       | 25                                 | 12       |
| $\text{CH}_2\text{Cl}_2$            | $\text{NaH}$                | 25                                 | 12       |
| $\text{CH}_2\text{CH}_2\text{Cl}_2$ | ${}^i\text{Pr}_2\text{EtN}$ | 60                                 | 12       |

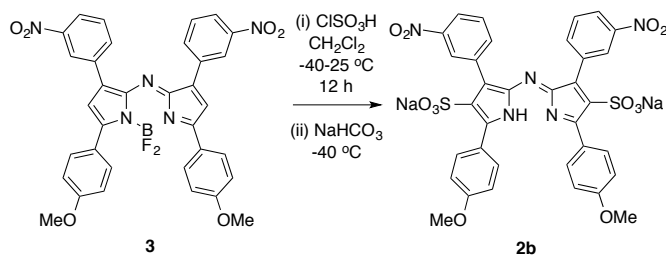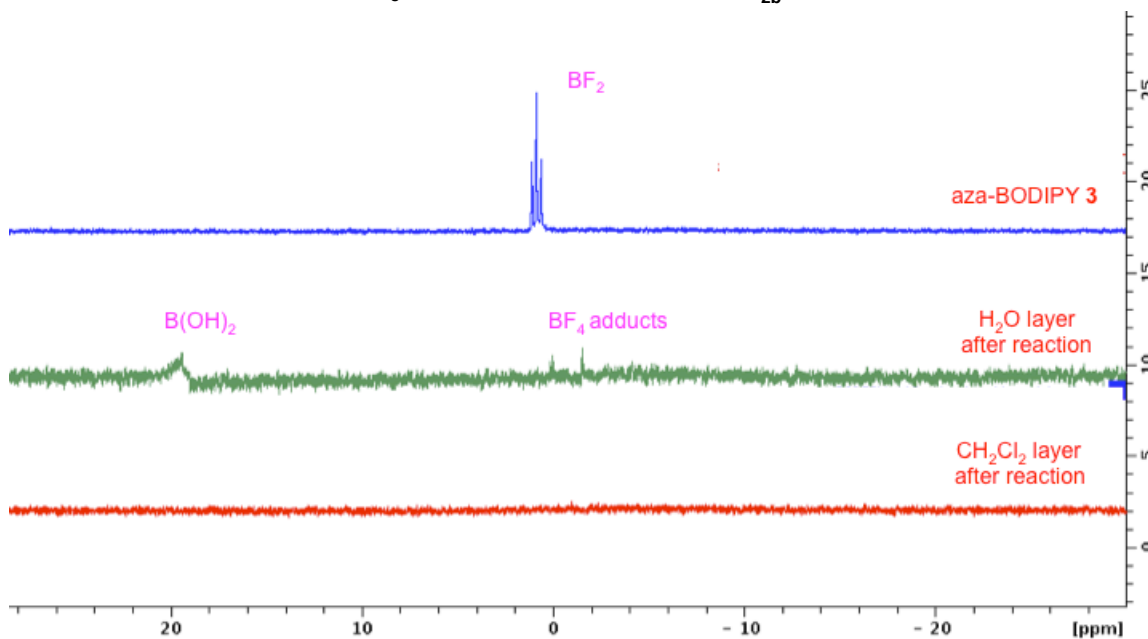

**Fig. S1**  ${}^{11}\text{B}$  NMR of the crude product showed the loss of the  $\text{BF}_2$  fragment.

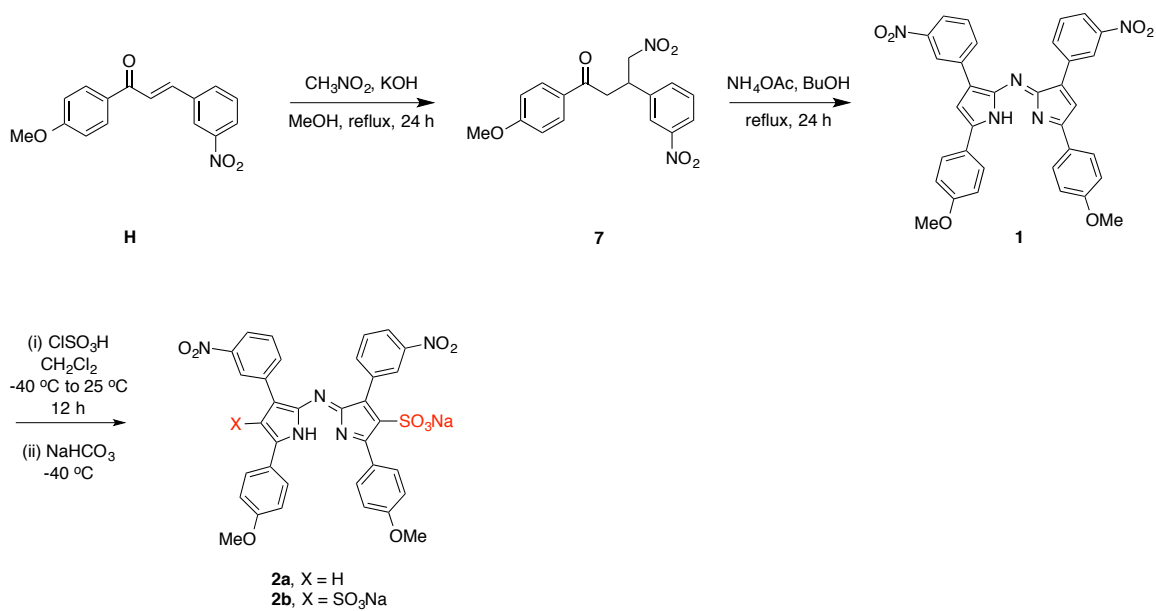

**Scheme S1.**

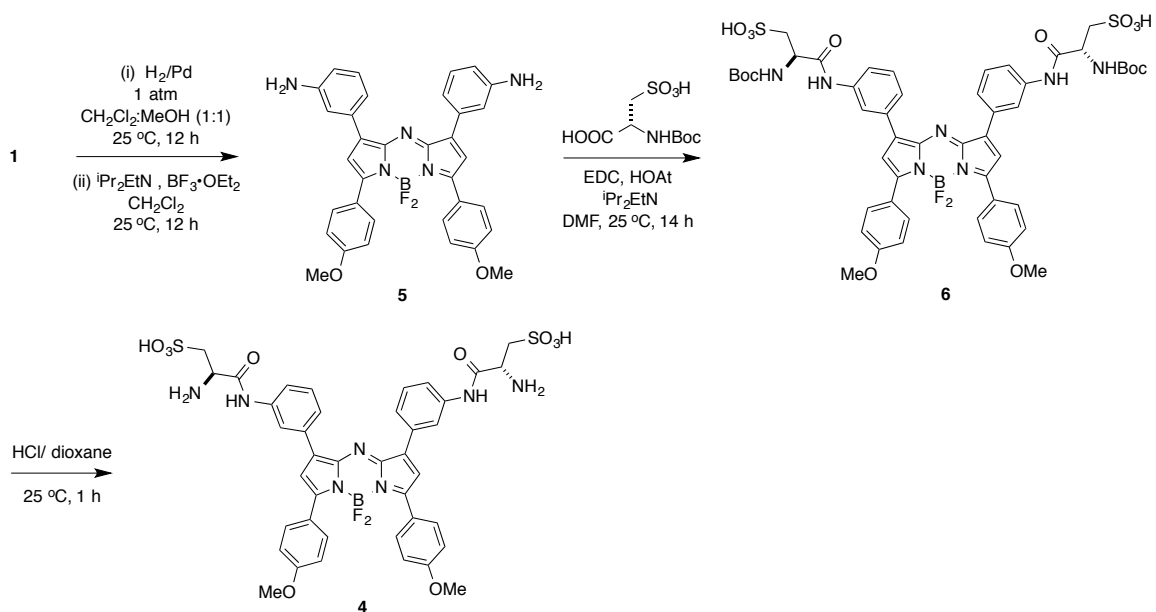

**Scheme S2.**

### 1-(4-methoxyphenyl)-4-nitro-3-(3-nitrophenyl)butan-1-one (7).

Potassium hydroxide (33.6 g, 60 mmol) was added to a solution of chalcone **H** (17 g, 60 mmol) in MeOH (250 mL) at  $25\text{ }^\circ\text{C}$ . Nitromethane (64 mL, 1.2 mol) was added to the reaction mixture, and then the reaction was heated to reflux at  $78\text{ }^\circ\text{C}$  for 24 h. After the reaction was cooled to  $25\text{ }^\circ\text{C}$ , HCl (0.2 N) was added to neutralize. Precipitate was filtered out and washed with cold MeOH. The product was obtained as slightly brown

solid (14.5 g, 70 % yield) and used without further purification.  $^1\text{H}$  NMR (400 MHz,  $\text{CDCl}_3$ )  $\delta$  8.21 (s, 1H), 8.19 (d,  $J = 7.7$  Hz, 1H), 7.92 (d,  $J = 8.9$  Hz, 2H), 7.69 (d,  $J = 7.7$  Hz, 1H), 7.54 (dd,  $J = 7.9, 7.9$  Hz, 1H), 6.95 (d,  $J = 8.9$  Hz, 2H), 4.89 (m, 1H), 4.75 (m, 1H), 4.38 (m, 1 H), 3.90 (s, 3 H), 3.47 (d,  $J = 6.9$  Hz, 2H).  $^{13}\text{C}$  (100 MHz,  $\text{CDCl}_3$ )  $\delta$  194.3, 164.1, 141.5, 134.3, 130.3, 130.2, 130.0, 129.1, 122.9, 122.2, 114.0, 79.0, 55.5, 40.7, 39.0. MS (ESI+) calcd for  $\text{C}_{17}\text{H}_{17}\text{N}_2\text{O}_6$   $\{\text{M}+\text{H}\}^+$  345.1087, found 345.1096.

**(Z)-5-(4-methoxyphenyl)-N-(5-(4-methoxyphenyl)-3-(3-nitrophenyl)-1H-pyrrol-2-yl)-3-(3-nitrophenyl)-2H-pyrrol-2-imine (1).**

**7** (10 g, 29 mmol) was dissolved in  $n\text{BuOH}$  (300 mL). Ammonium acetate (78 g, 1 mol) was added to the solution. The reaction was heated up to reflux at 120  $^\circ\text{C}$  and stirred for 24 h. The mixture was cooled to 40  $^\circ\text{C}$ , then the solvent was removed. The residue was precipitated in cold EtOH, the solid was filtered to give dark solid **1** (9 g, 52 % yield). The product was used without further purification. NMR spectra cannot be obtained from compound **1** due to solubility. However, after complexation with  $\text{BF}_2$  to yield compound **3**, the NMR was obtained nicely.  $^1\text{H}$  NMR (400 MHz,  $\text{CDCl}_3$ )  $\delta$  8.92 (s, 2H), 8.37 (d,  $J = 7.2$  Hz, 2H), 8.28 (d,  $J = 8.0$  Hz, 2H), 8.14 (d,  $J = 8.6$  Hz, 4H), 7.70 (t,  $J = 7.8$  Hz, 2H), 7.20 (s, 2H), 7.06 (d,  $J = 8.6$  Hz, 4H), 3.91 (s, 6H).  $^{13}\text{C}$  (100 MHz,  $\text{CD}_2\text{Cl}_2$ )  $\delta$  161.6, 158.3, 155.5, 149.4, 148.7, 141.3, 140.8, 135.0, 133.7, 133.3, 132.4, 131.5, 130.7, 130.3, 130.2, 128.9, 124.2, 124.1, 124.0, 122.5, 122.3, 117.6, 116.7, 114.8, 114.6, 55.8. HRMS(ESI-) calcd for  $\text{C}_{34}\text{H}_{24}\text{BClF}_2\text{N}_5\text{O}_6$   $\{\text{M}+\text{Cl}\}^-$  682.1476, found 682.1464.

**Synthesis of disulfonic acid (2a, 2b)**

**1** (30 mg, 0.05 mmol) was dissolved in  $\text{CH}_2\text{Cl}_2$  (5.5 mL) and the solution was cooled to -40  $^\circ\text{C}$ . Solution of chlorosulfonic acid (1 eq. for **2a** and 4 eq. for **2b**) in  $\text{CH}_2\text{Cl}_2$  (0.5 mL) was slowly added to the solution over 5 min at -40  $^\circ\text{C}$ . The mixture was slowly warmed to 25  $^\circ\text{C}$  and stirred for 5-12 h. The reaction was quenched with sat.  $\text{NaHCO}_3$  at -40  $^\circ\text{C}$ . Organic layer was separated and the crude product was purified by flash silica chromatography eluting with  $\text{CH}_2\text{Cl}_2:\text{MeOH}$  (85:15) to yield 20 mg (60 %) of **2a** as a purple powder.  $^1\text{H}$  NMR (400 MHz,  $\text{CDCl}_3$ )  $\delta$  8.54 (s, 2H), 8.18 (d,  $J = 7.2$  Hz, 1H), 8.18 (d,  $J = 7.6$  Hz, 1H), 8.13 (d,  $J = 7.6$  Hz, 1H), 8.06 (d,  $J = 7.2$  Hz, 1H), 7.95 (d,  $J =$

7.8 Hz, 2H), 7.91 (d,  $J = 8.1$  Hz, 2H), 7.48 (t,  $J = 7.6$  Hz, 1H), 7.37 (s, 1H), 7.34-7.8 (m, 1H, overlap with  $\text{CDCl}_3$ ) 7.01-6.97 (m, 4H), 3.86 (s, 6H). HRMS (ESI-) calcd for  $\text{C}_{34}\text{H}_{24}\text{N}_5\text{O}_9\text{S}^- \{\text{M-Na}\}^-$  678.1300, found 678.1321. For **2b**, the product was precipitated from the reaction. The precipitate was filtered to give a purple powder 60 mg, 79 % yield. NMR cannot be obtained due to solubility. HRMS (ESI-) calcd for  $\text{C}_{34}\text{H}_{23}\text{N}_5\text{NaO}_{12}\text{S}_2^- \{\text{M-Na}\}^-$  780.0676, found 780.0640.

**3,3'-(5,5-difluoro-3,7-bis(4-methoxyphenyl)-5H-4 $\lambda^4$ ,5 $\lambda^4$ -dipyrrolo[1,2-c:2',1'-f][1,3,5,2]triazaborinine-1,9-diyl)dianiline (5).**

**1** (1 g, 1.67 mmol) was dissolved in  $\text{CH}_2\text{Cl}_2$  : MeOH (1:1, 30 mL). Pd/C (180 mg, 0.17 mmol) was added to the solution. The mixture was stirred under  $\text{H}_2$  (1 atm) at 25 °C for 20 h, the reaction was followed by TLC. The product was filtered through Celite<sup>®</sup> to give dark blue solid after the solvent was removed. The solid was then dissolved in  $\text{CH}_2\text{Cl}_2$  (200 mL), *N,N*-diisopropylethylamine (2.9 mL, 16.7 mmol) was added to the solution. The mixture was stirred at 25 °C for 20 min,  $\text{BF}_3 \cdot \text{OEt}_2$  (3.1 mL, 25 mmol) was then added in portions and the mixture was stirred at 25 °C for 12 h. The reaction was quenched with careful addition of  $\text{H}_2\text{O}$  (20 mL) and the system was stirred vigorously for 15 min. The organic layer was separated and washed with HCl (0.2 N, 1 × 10 mL), NaOH (2 N, 2 × 10 mL) and brine (10 mL). The organic layer was dried over  $\text{MgSO}_4$ , filtered, and the solvent was removed under reduced pressure. The residue was purified by flash silica chromatography eluting with EtOAc:Hexanes (3:1 to 2:1) to yield 883 mg (90 %) of **4** as a dark green solid.  $^1\text{H}$  NMR (400 MHz,  $\text{CDCl}_3$ )  $\delta$  8.09 (d,  $J = 8.9$  Hz, 4H), 7.71 (s, 2H), 7.33 (d,  $J = 7.8$  Hz, 2H), 7.24 (d,  $J = 7.8$  Hz, 2H), 7.03 (d,  $J = 9.8$  Hz, 4H). 6.77-6.74 (m, 2H), 3.91 (s, 6H).  $^{13}\text{C}$  (100 MHz,  $\text{CDCl}_3$ )  $\delta$  161.9, 158.0, 146.6, 145.3, 143.0, 133.5, 131.6, 129.4, 124.3, 119.3, 118.6, 116.4, 116.2, 114.2, 55.4.  $^{11}\text{B}$  NMR (128 MHz,  $\text{CDCl}_3$ )  $\delta$  0.94 (t,  $J = 31.9$  Hz, BF2) ppm.  $^{19}\text{F}$  NMR (376 MHz,  $\text{CDCl}_3$ )  $\delta$  -131.89 (q,  $J = 31.9$  Hz, BF2). HRMS (ESI+) calcd for  $\text{C}_{34}\text{H}_{29}\text{BF}_2\text{N}_5\text{O}_2 \{\text{M+H}\}^+$  588.2382, found 588.2359.

**(2R,2'R)-3,3'-(((5,5-difluoro-3,7-bis(4-methoxyphenyl)-5H-4 $\lambda^4$ ,5 $\lambda^4$ -dipyrrolo[1,2-c:2',1'-f][1,3,5,2]triazaborinine-1,9-diyl)bis(3,1-phenylene))bis(azanediyl))bis(2-**

**((*tert*-butoxycarbonyl)amino)-3-oxopropane-1-sulfonic acid) (6).**

Boc-protected Cysteic acid (367 mg, 1.28 mmol) was dissolved in DMF and cooled to 0 °C. 1-Ethyl-3-(3-dimethylaminopropyl)carbodiimide, EDC (274 mg, 1.43 mmol) and 1-hydroxy-7-azabenzotriazole, HOAt (198 mg, 1.46 mmol) were added to the solution. After stirring for 30 min, compound **5** (150 mg, 0.26 mmol) was added to the reaction mixture. *N,N*-Diisopropylethylamine (0.45 mL, 2.6 mmol) was then added in one portion. The reaction was stirred at 25 °C for 14 h. The solvent was removed and the product was purified by reverse phase MPLC eluting with water and acetonitrile to yield 212 mg (75 %) as a greenish powder. <sup>1</sup>H NMR (400 MHz, CD<sub>3</sub>OD) δ 8.14 (s, 2H), 8.08 (d, *J* = 8.6 Hz, 4H), 7.90 (d, *J* = 6.0 Hz, 2H), 7.53 (m, 2H), 7.33 (m, 2H), 7.15 (s, 2H), 6.98 (d, *J* = 8.6 Hz, 4H), 3.86 (s, 6H), 3.62-3.59 (m, 2H), 3.17-3.11 (m, 4H), 1.47 (s, 18H). <sup>13</sup>C (100 MHz, CD<sub>3</sub>OD) δ 170.3, 162.2, 160.1, 157.7, 156.2, 144.9, 142.2, 138.4, 132.7, 131.7, 128.7, 125.7, 123.6, 120.4, 118.9, 79.7, 55.2, 54.8, 42.1, 27.4. HRMS (MALDI-) calcd for C<sub>50</sub>H<sub>53</sub>BF<sub>2</sub>N<sub>7</sub>O<sub>14</sub>S<sub>2</sub> {M-H}<sup>-</sup> 1088.3156, found 1088.3108.

**(*R*)-2-amino-3-((3-(9-(3-((*R*)-2-amino-3-sulfopropanamido)phenyl)-5,5-difluoro-3,7-bis(4-methoxyphenyl)-5*H*-4λ<sup>4</sup>,5λ<sup>4</sup>-dipyrrolo[1,2-*c*:2',1'-*f*][1,3,5,2]triazaborinin-1-yl)phenyl)amino)-3-oxopropane-1-sulfonic acid (4).**

Compound **5** (40 mg, 0.37 mmol) was dissolved in dioxane (5 mL). Solution of HCl in dioxane (2 M, 5 mL) was added into the solution. The reaction was stirred at 25 °C for 1 h. The solvent was removed to yield **4** 33 mg, quantitative yield as a green solid. <sup>1</sup>H NMR (400 MHz, DMSO-*d*6) δ 10.81 (s, 2H), 8.25 (s, 2H), 8.17 (d, *J* = 8.9 Hz, 4H), 7.95 (d, *J* = 7.7 Hz, 2H), 7.74 (d, *J* = 7.2 Hz, 2H), 7.51 (t, *J* = 8.0 Hz, 2H), 7.44 (s, 2H), 7.16 (d, *J* = 8.9 Hz, 4H), 4.19 (br, 2H), 3.90 (s, 6H), 3.21-3.18 (m, 2H), 2.94 (dd, *J* = 9.8 Hz, 4H). <sup>13</sup>C (100 MHz, DMSO-*d*6) δ 166.5, 162.6, 158.0, 145.0, 142.7, 139.0, 132.8, 132.3, 129.8, 125.9, 123.6, 121.6, 120.5, 120.3, 115.0, 56.1, 51.5, 50.7. <sup>11</sup>B NMR (128 MHz, DMSO-*d*6) δ: 0.88 (t, *J* = 32.0 Hz, BF<sub>2</sub>) ppm. <sup>19</sup>F NMR (376 MHz, DMSO-*d*6) δ: -130.52 (q, *J* = 32.0 Hz, BF<sub>2</sub>). HRMS (MALDI-) calcd for C<sub>40</sub>H<sub>36</sub>BF<sub>2</sub>N<sub>7</sub>NaO<sub>10</sub>S<sub>2</sub> {M-Na}<sup>-</sup> 910.1925, found 910.1968.

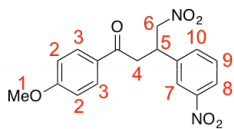

7

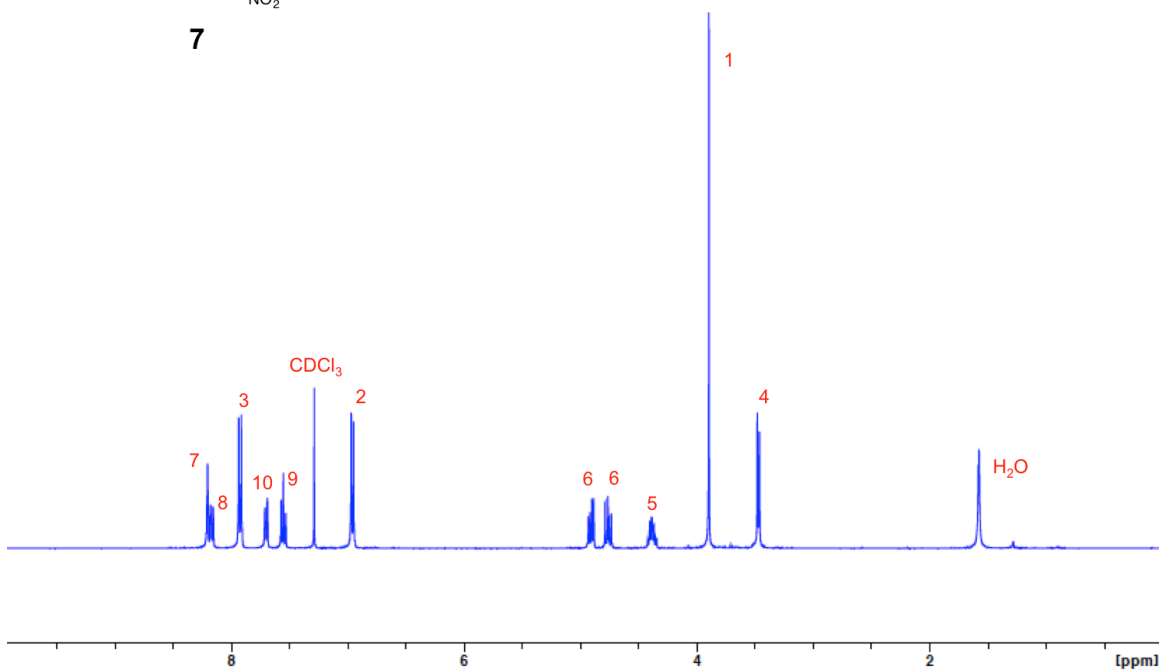

<sup>1</sup>H-NMR of compound 7

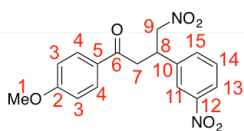

7

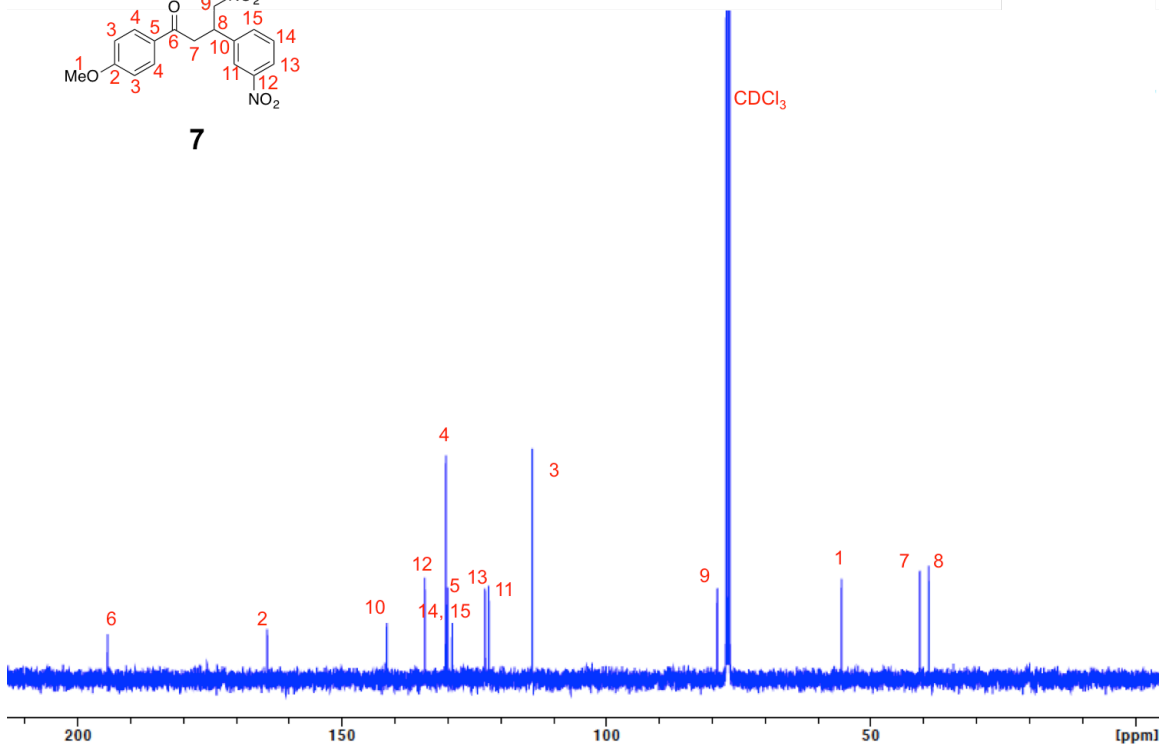

<sup>13</sup>C-NMR of compound 7



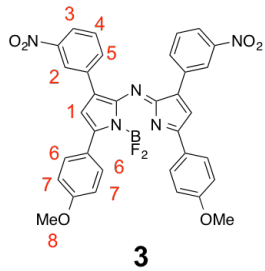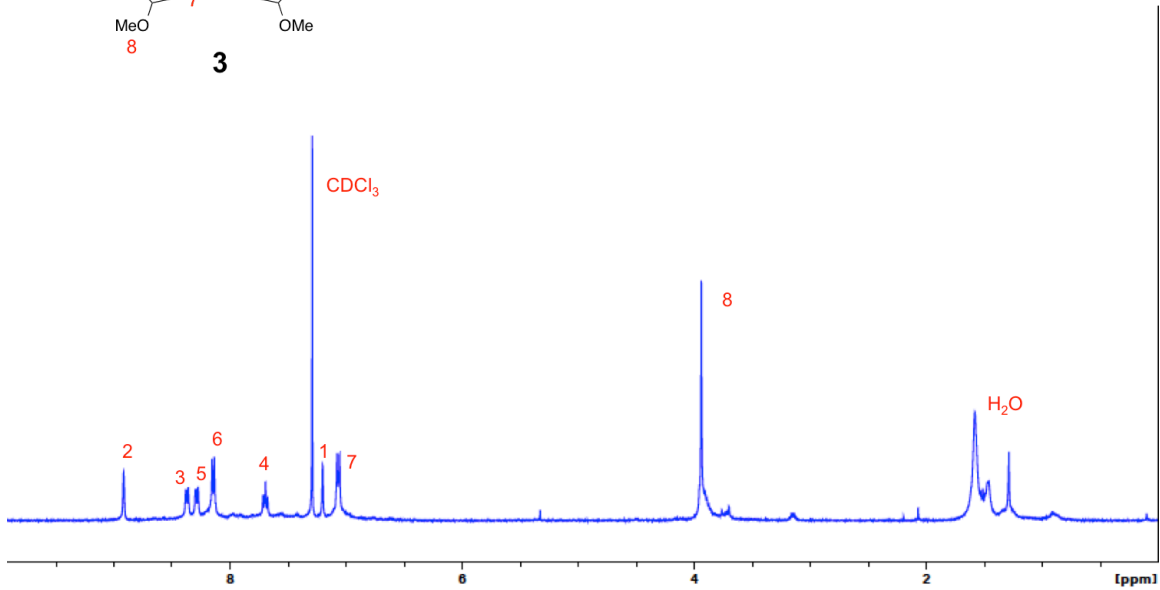

**<sup>1</sup>H-NMR of compound 3**

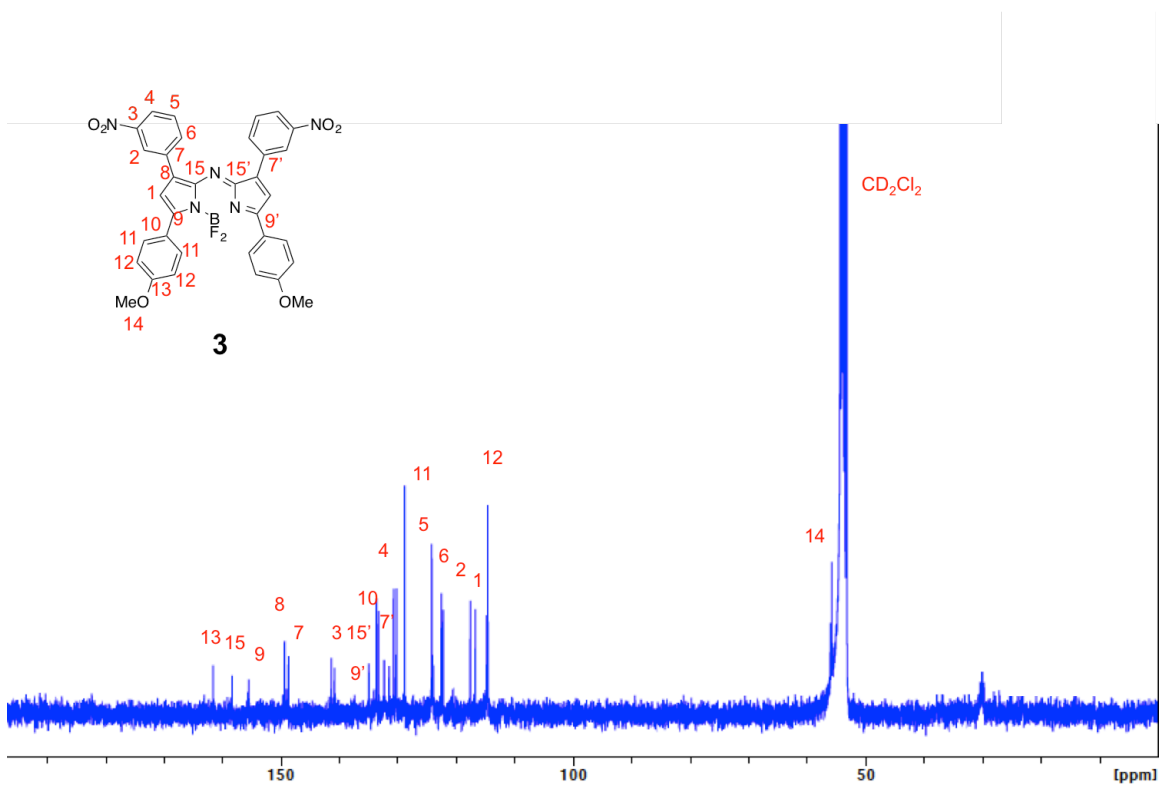

**<sup>13</sup>C-NMR of compound 3**

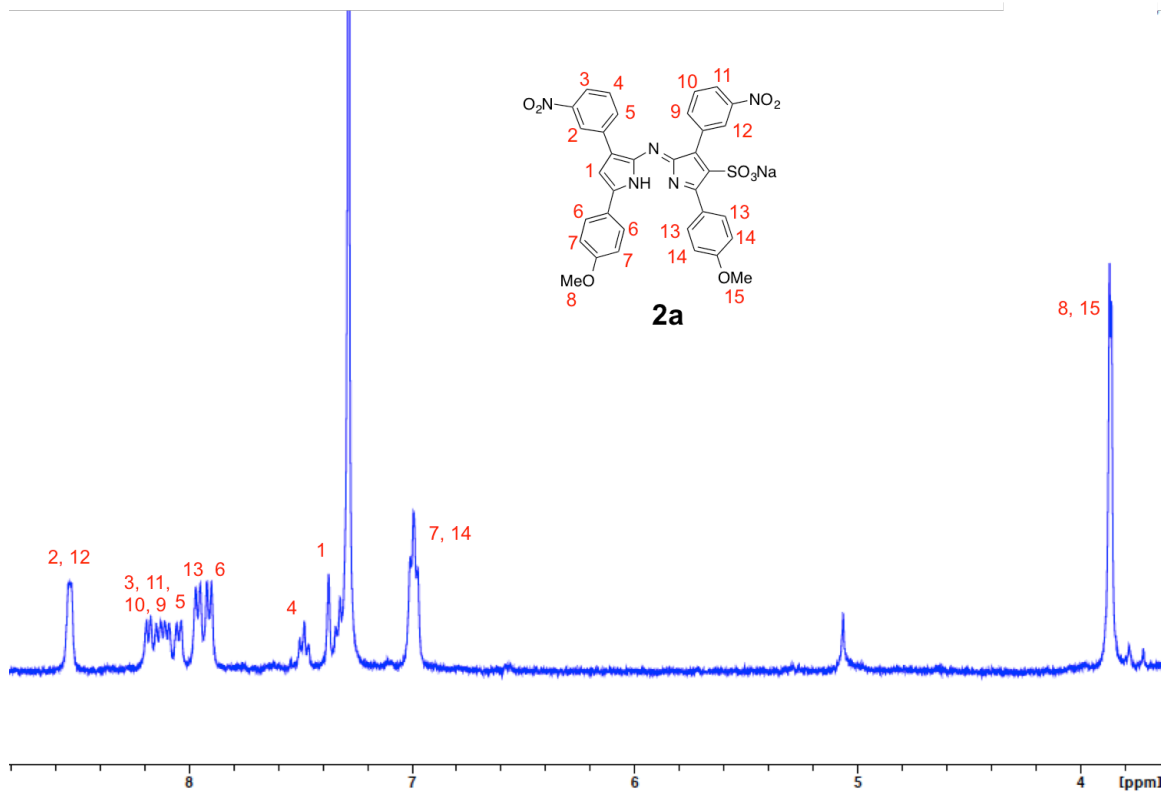

**<sup>1</sup>H-NMR of compound 2a**

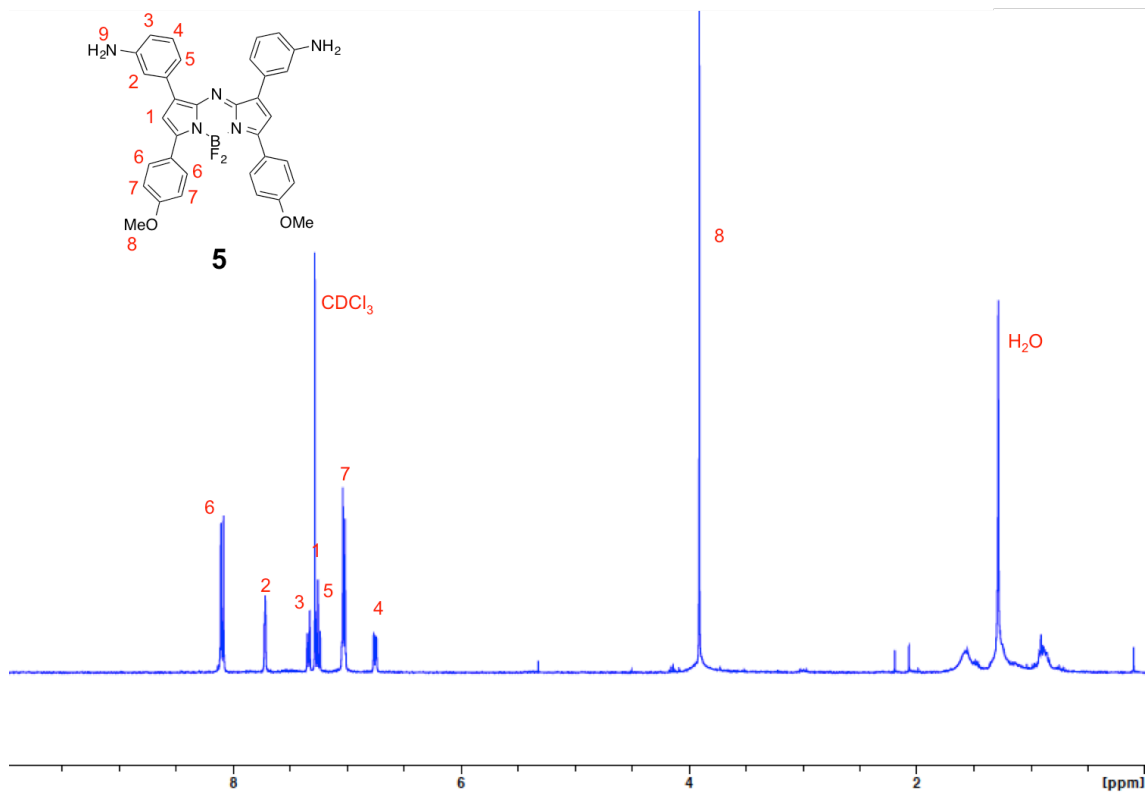

**<sup>1</sup>H-NMR of compound 5**

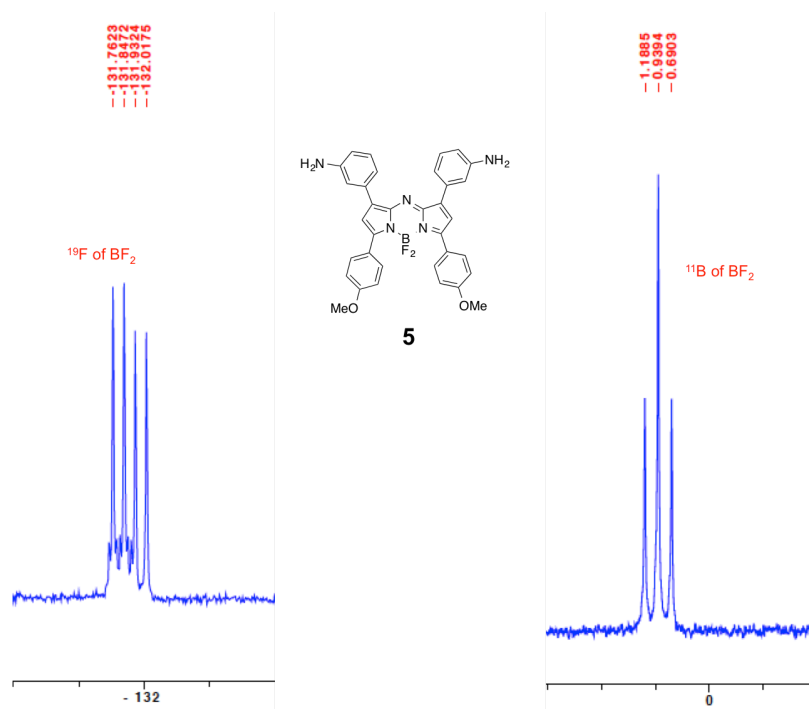

**<sup>11</sup>B, <sup>19</sup>F-NMR of compound 5**

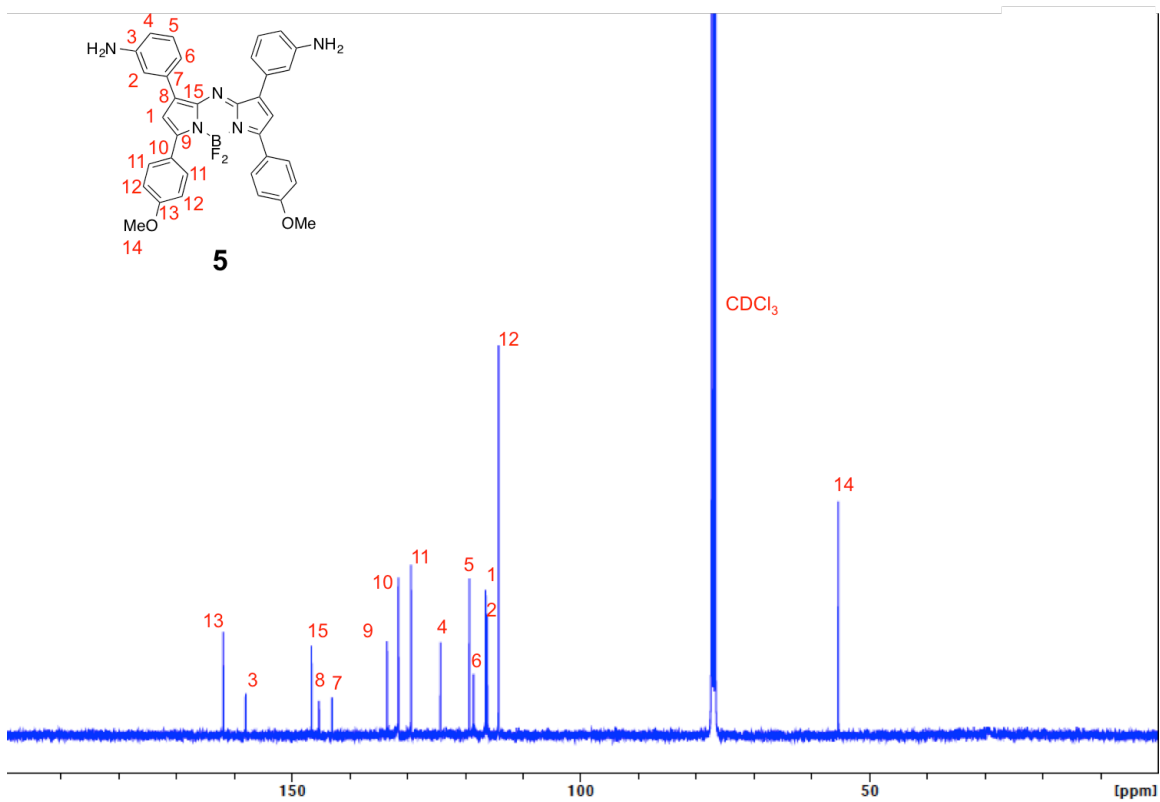

**<sup>13</sup>C-NMR of compound 5**

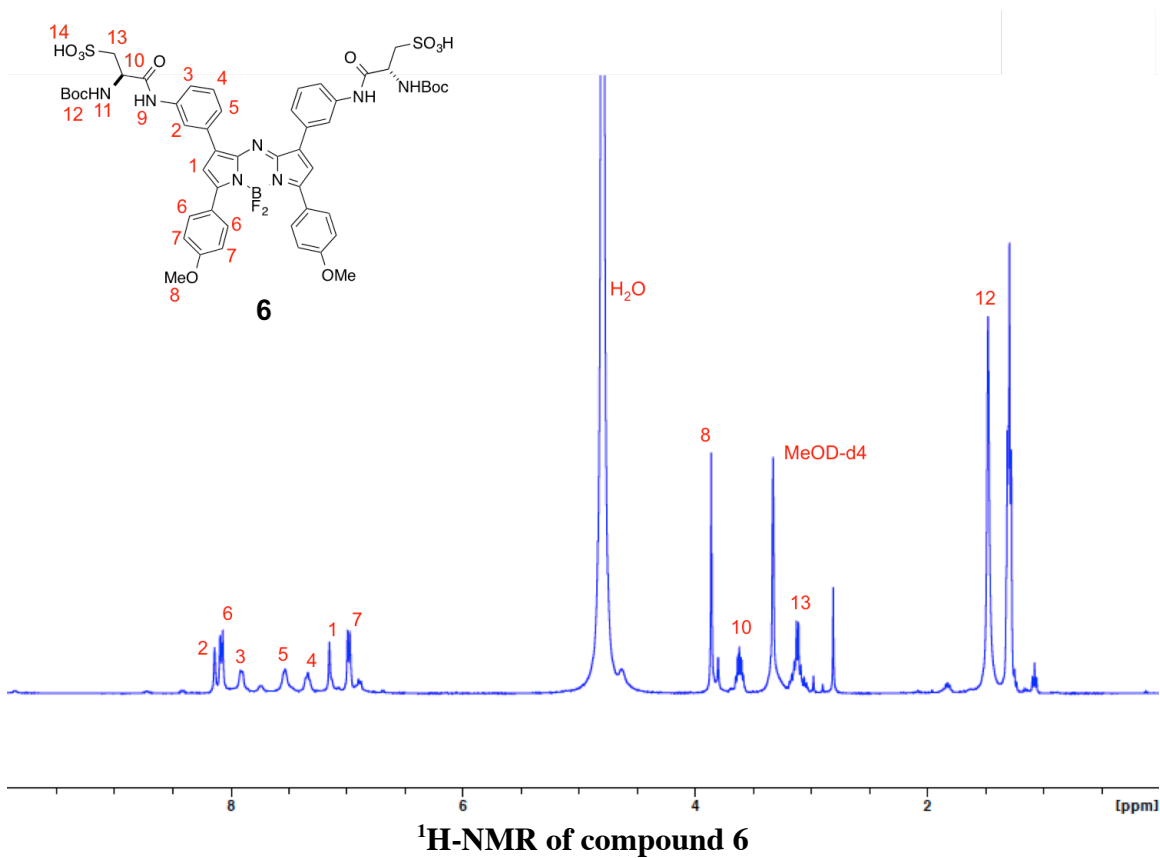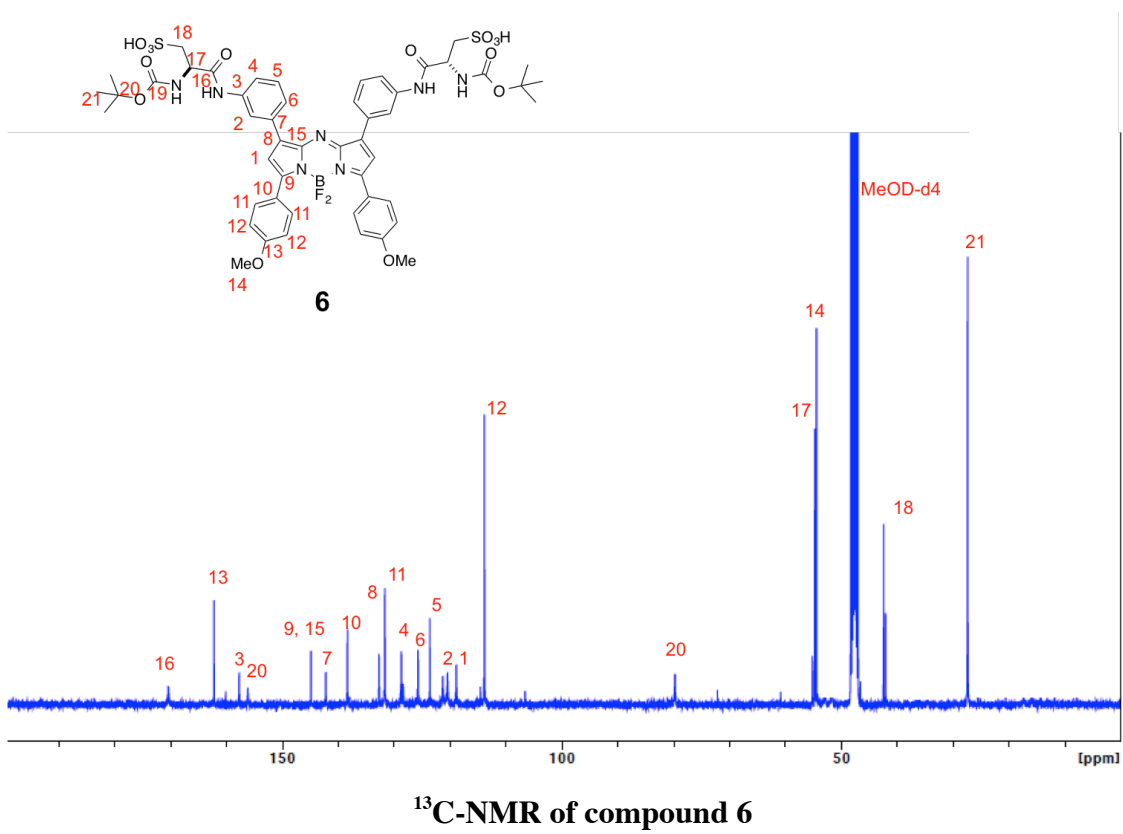

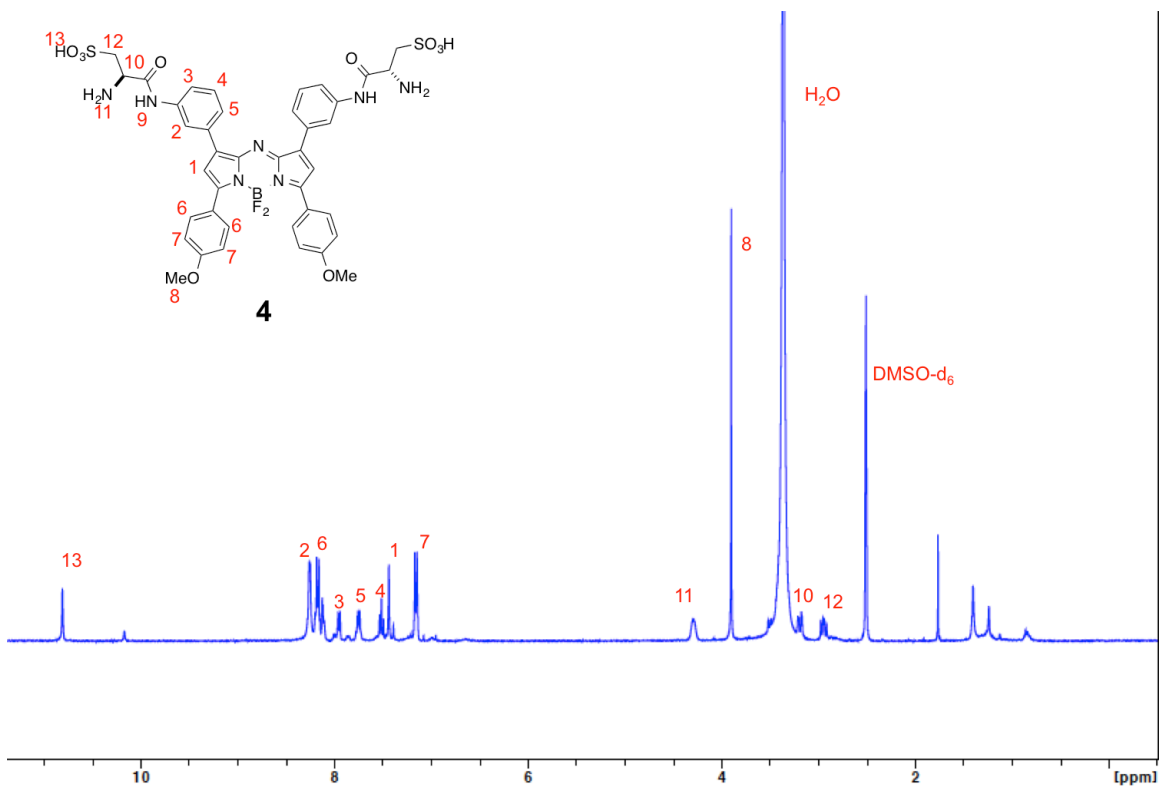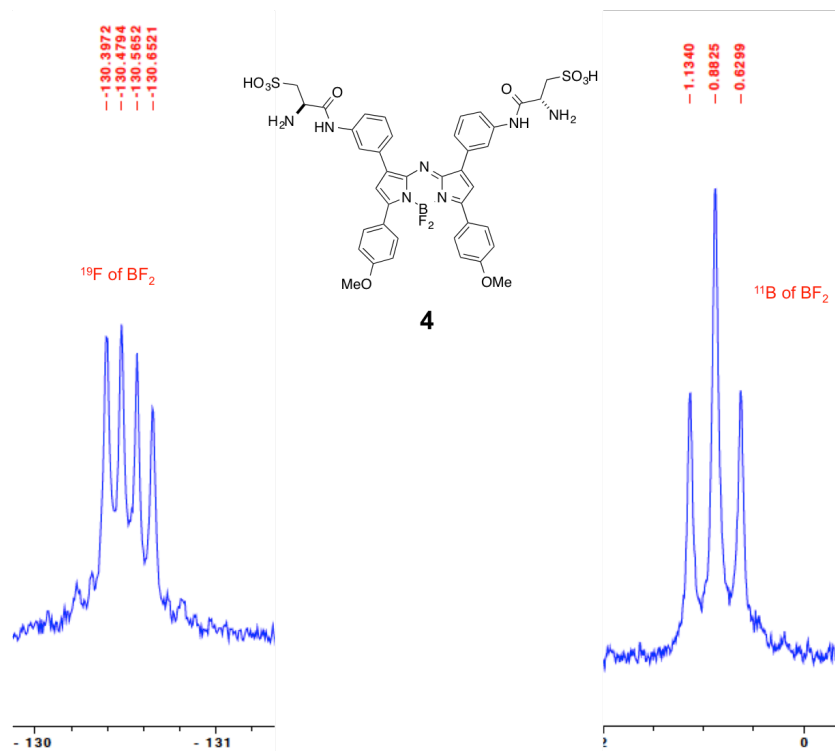

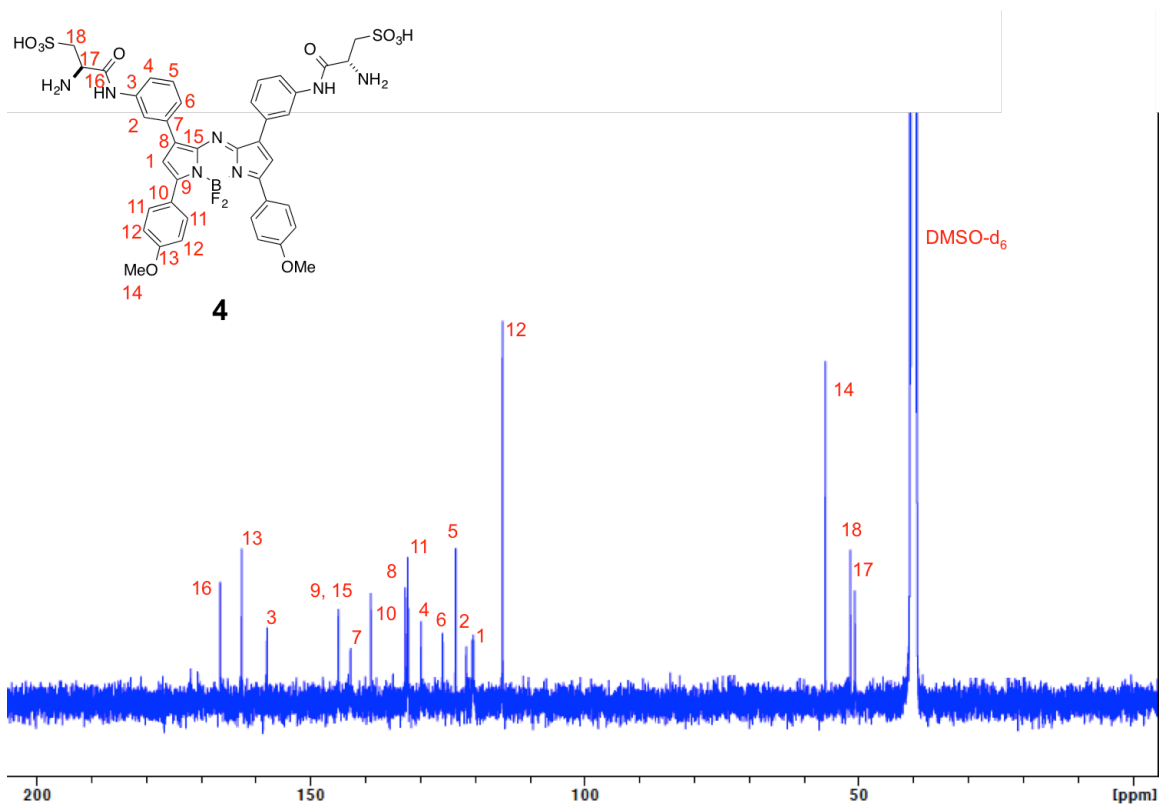

$^{13}\text{C}$ -NMR of compound 4

### 3. Spectroscopic Data Of Compound 4.

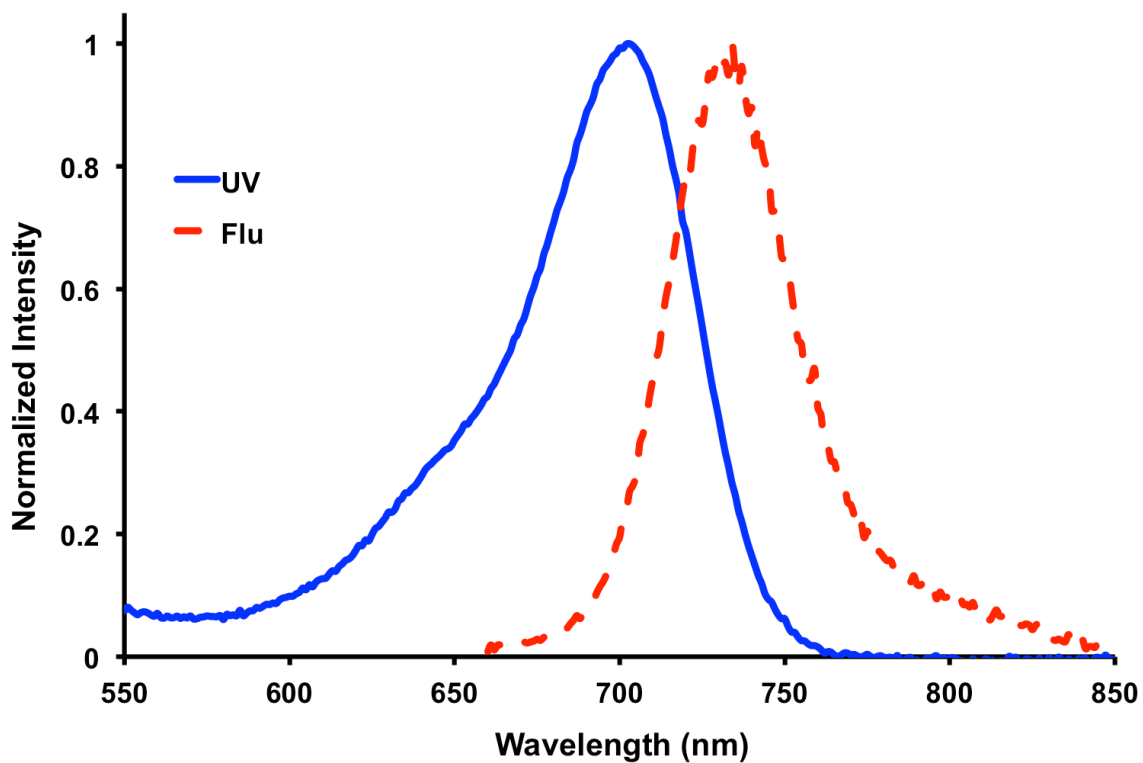

Fig. S2 UV and fluorescent spectra of **4** in DMSO.

Table S2. Spectroscopic Data of Compound **4**.

| Solvent          | $\lambda_{\text{abs max}}$ (nm) | $\epsilon(\text{M}^{-1} \text{cm}^{-1}) \times 10^4$ | $\lambda_{\text{emis max}}$ (nm) <sup>a</sup> | $\Phi_{\text{F}}$ <sup>b</sup> |
|------------------|---------------------------------|------------------------------------------------------|-----------------------------------------------|--------------------------------|
| DMSO             | 703                             | 6.12                                                 | 730                                           | $0.17 \pm 0.003$               |
| PBS <sup>c</sup> | 701                             | 4.72                                                 | 729                                           | $0.34 \pm 0.010$               |

<sup>a</sup>Excited at 650 nm. <sup>b</sup>Relative to Zn-phthalocyanine in 1% pyridine/toluene ( $\Phi_{\text{F}} = 0.30$ ). <sup>c</sup>Contained 0.1% CrEL, pH 7.4.

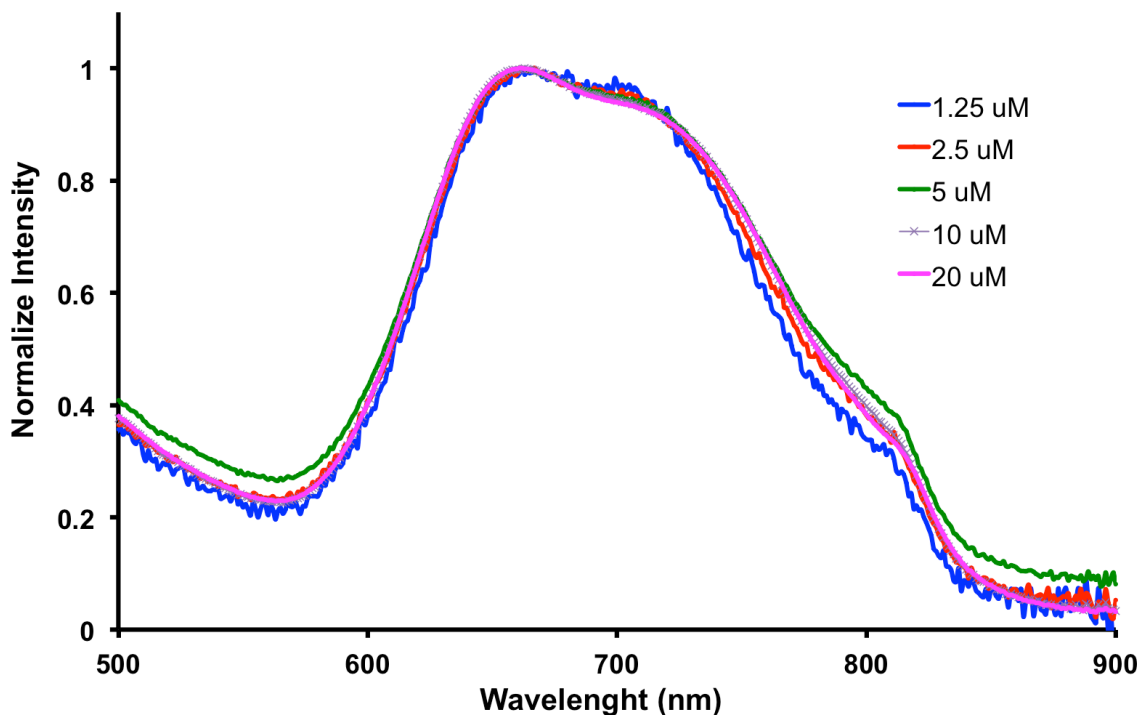

**Fig. S3** UV absorptions of **4** at different concentrations. No evidence of aggregation was observed when concentration dependence of **4** in PBS buffer (without additives) was used.

#### 4. Thermodynamic Equilibrium Solubility Measurement

Stock solutions (0.1 M) of test compounds were prepared in DMSO then diluted with aqueous media (PBS pH 7.4 or carbonate buffer pH 9 or acetate buffer pH 4) to desired concentrations (0 – 1000 μM, the highest concentration contained 1 % DMSO). Then, the plate covered with aluminium foil was shaken horizontally for 6 h at 25 °C and kept overnight for equilibration. Thereafter, the plate was centrifuged at 100 rpm for 20 min. Supernatant was pipetted into 96-well UV transparent plate (Corning® 96 Well Clear Flat Bottom UV-Transparent Microplate) and analyzed at  $\lambda = 680$  nm of compounds against blank using microplate reader (Biotek Synergy H4).



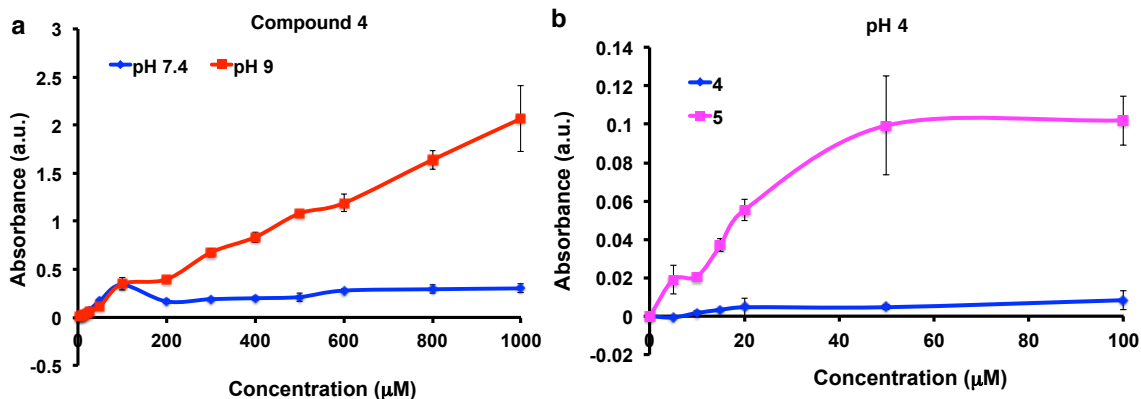

**Fig. S4** Solubility Profile. **a** Compound **4** is soluble in PBS pH 7.4 up to 100  $\mu\text{M}$  and more than 1 mM can be dissolved in carbonate buffer pH 9. **b** In acetate buffer, compound **4** is only soluble up to 20  $\mu\text{M}$ , whereas **5** can be soluble up to 50  $\mu\text{M}$ . The analysis was performed in triplicate for each compound.

## 5. Cell Culture And Imaging Studies

4T1 cells were cultured on 75  $\text{cm}^2$  culture flasks in Dulbecco's Modified Eagle Medium/nutrient mixture F-12 (DMEM/F12, Sigma Chemical, St. Louis, MO) supplemented with 10 % FBS. Cells were cultured in a humidified incubator at 37  $^\circ\text{C}$  with 5 %  $\text{CO}_2$  and 95 % air.

Subcellular localization was measured on living 4T1 cells using a Olympus FV1000 Confocal Microscope. Throughout, digital images were captured with a 100x / 1.4 oil objective with the following filter sets: for LysoTracker Green: excitation 488 nm; for aza-BODIPY **4**: excitation 633 nm. Sequential optical sections (Z-stacks) from the basal-to-apical surfaces of the cell were also acquired.

### *Lysosomal Co-localization*

Cells were incubated with fluorophores for 3 h at 37  $^\circ\text{C}$ . After the cells were washed with PBS (2X), LysoTracker Green was added and the cells were incubated for 30 min at 37  $^\circ\text{C}$ . The cells were washed again with PBS before imaging.
